# Supplementary material for: Feeding Interventions for Infants with Growth Failure in the First Six Months of Life: A Systematic Review
Source: MDPI journal article supplement (doi:10.3390/nu12072044), 2020-07-09
Supplement: s1 [file s1]

**Table S1.** Information on the declaration of financial support and conflict of interest

| <b>Author (year)</b>                                            | <b>Population Characteristics</b>                                                   | <b>Intervention</b>                                                                                                                                             | <b>Funding</b>                        | <b>Conflict of Interest</b> |
|-----------------------------------------------------------------|-------------------------------------------------------------------------------------|-----------------------------------------------------------------------------------------------------------------------------------------------------------------|---------------------------------------|-----------------------------|
| <b>Cup feeding interventions (n=2)</b>                          |                                                                                     |                                                                                                                                                                 |                                       |                             |
| Abouelfettoh (2008)                                             | Preterm (LBW)<br>[GA: 35.13wk, Bwt: 2150g]<br>Recruitment: NICU                     | <b>Cup feeding</b><br>IG: Only cup feeding<br>CG: Only bottle feeding                                                                                           | Not mentioned in the paper            | None declared               |
| Yilmaz (2014)                                                   | Preterm (VLBW)<br>[GA: 32-35wk, Bwt: 1543g]<br>Recruitment: NICU                    | <b>Cup feeding</b><br>G1: Cup feeding<br>G2: Bottle feeding                                                                                                     | Authors received no financial support | None declared               |
| <b>Formula Fortification/Supplementation interventions (31)</b> |                                                                                     |                                                                                                                                                                 |                                       |                             |
| Abrams (2014)                                                   | Preterm (VLBW)<br>[Bwt: <1,250g]<br>Recruitment: NICU                               | <b>Cow milk</b><br>G1: HM [HM (mother's own/donor milk) + HM based fortifier]<br>G2: CM [cow milk formula + cow milk-based fortifier]                           | Prolacta Bioscience                   | None declared               |
| Alan (2013)                                                     | Preterm (VLBW)<br>[GA: ≤32wk, Bwt: ≤1500g]<br>Recruitment: NICU                     | <b>Protein supplementation</b><br><u>When mothers expressed first milk</u><br>IG: HM with extra protein supplementation<br>CG: HM with a standard fortification | Authors received no financial support | None declared               |
| Arslanoglu (2006)                                               | Preterm (LBW, VLBW, ELBW)<br>[GA: 26-34wk, Bwt: 600-1750g]<br>Recruitment: Hospital | <b>Protein supplementation</b><br><u>When volume reached 150ml/kg/d</u><br>G1: HMF + additional protein<br>G2: HM with HMF in the standard amount               | Authors received no financial support | Not mentioned in the paper  |
| Florendo (2009)                                                 | Preterm (VLBW)<br>[GA: ≤32wk, Bwt: 1200g]<br>Recruitment: New born medical centre   | <b>Protein supplementation</b><br>IG: Partially hydrolysed whey protein<br>CG: Non-hydrolysed whey casein preterm infant formula                                | Nestec Ltd, Vevey, Switzerland        | Not mentioned in the paper  |
| Kim (2015)                                                      | Preterm (VLBW)<br>[GA: ≤33wk, Bwt: 1174g]                                           | <b>Protein supplementation</b><br><u>When volume reached 100ml/kg/d</u>                                                                                         | Abbott Nutrition                      | None declared               |

| Author (year)     | Population Characteristics                                                                                                                       | Intervention                                                                                                                                                                                                  | Funding                               | Conflict of Interest                                                         |
|-------------------|--------------------------------------------------------------------------------------------------------------------------------------------------|---------------------------------------------------------------------------------------------------------------------------------------------------------------------------------------------------------------|---------------------------------------|------------------------------------------------------------------------------|
|                   | Recruitment: NICU                                                                                                                                | IG: Conc. HMF containing liquid extensively hydrolysed protein<br>CG: Powdered intake protein HMF                                                                                                             |                                       |                                                                              |
| Erasmus (2002)    | Preterm (VLBW)<br>[GA: 26-34wk, Bwt: 1407g]<br>Recruitment: NICU                                                                                 | <b>Lactase fortification</b><br><u>From birth (day 1) to 36 wk or discharged</u><br>IG: Fortified HM or preterm formula treated with lactaid drops (Lactase)<br>CG: Untreated fortified HM or preterm formula | Authors received no financial support | Not mentioned in the paper                                                   |
| Gathwala (2007)   | Term SGA (LBW)<br>[GA: 40wk, Bwt: 2000g]<br>Recruitment: Hospital                                                                                | <b>Lactase fortification</b><br><u>When volume reached 100ml/kg/d</u><br>IG: HM fortified with Lactodex-HMF<br>CG: Only BM                                                                                    | Authors received no financial support | Not mentioned in the paper                                                   |
| Berseth (2004)    | Preterm (VLBW)<br>[GA: ≤33wk, Bwt: 1180g]<br>Recruitment: Hospital                                                                               | <b>Iron fortification</b><br><u>When volume reached 100ml/kg/d</u><br>G1: HMF (iron fortified)<br>G2: HMF (standard)                                                                                          | Mead Johnson Nutritionals             | Berseth, Stolz, Harris and Hansen are employees of Mead Johnson Nutritionals |
| Willeitner (2017) | Preterm (VLBW, ELBW)<br>[GA: 29wk, Bwt: 500-1499g]<br>Recruitment: NICU                                                                          | <b>Iron fortification</b><br><u>Birth- day 3</u><br>IG: HM fortification (Conc. Preterm Formula 30- Similac Special Care 30 with iron)<br>CG: Standard Powdered HMF (Similac HMF)                             | Not mentioned in the paper            | Not mentioned in the paper                                                   |
| Clarke (2007)     | Faltering growth<br>[GA: 2-31wk]<br><3rd centile for weight and height for age; weight gain <50% of expected<br>Recruitment: Children's Hospital | <b>Nutrient fortification</b><br>G1: Nutrient-dense formula<br>G2: Energy-supplemented formula                                                                                                                | Nutricia Clinical Care                | None declared                                                                |
| Morlacchi (2016)  | Preterm (VLBW)<br>[GA: <32wk, Bwt: 1255g]                                                                                                        | <b>Nutrient fortification</b><br><u>First day</u>                                                                                                                                                             | Authors received no financial support | Not mentioned in the paper                                                   |

| <b>Author (year)</b> | <b>Population Characteristics</b>                                                  | <b>Intervention</b>                                                                                                                                                                             | <b>Funding</b>                                                                                                                                              | <b>Conflict of Interest</b> |
|----------------------|------------------------------------------------------------------------------------|-------------------------------------------------------------------------------------------------------------------------------------------------------------------------------------------------|-------------------------------------------------------------------------------------------------------------------------------------------------------------|-----------------------------|
|                      | Recruitment: NICU                                                                  | G1: Macronutrient fortification<br>G2: Standardized fortification (Aptamil BMF, FM85)                                                                                                           |                                                                                                                                                             |                             |
| Worrell (2002)       | Preterm (VLBW)<br>[GA: 27±3wk, Bwt: 925g]<br>Recruitment: NICU                     | <b>Nutrient fortification</b><br>G1: Transitional formula (TF-higher amounts of protein, Ca, P, and several trace minerals and vitamins)<br>G2: Standard formula                                | Not mentioned in the paper                                                                                                                                  | Not mentioned in the paper  |
| Cristofalo (2013)    | Preterm (ELBW)<br>[GA: <27wk, Bwt: 989g]<br>Recruitment: NICU                      | <b>Bovine milk</b><br>G1: Exclusive appropriately fortified HM<br>G2: Bovine milk-based preterm formula<br><u>1-4d after birth and continued at 10-20 ml/kg/d as tolerated for up to 5 days</u> | Prolacta Bioscience                                                                                                                                         | Not mentioned in the paper  |
| Hair (2014)          | Preterm (ELBW)<br>[GA: 28wk, Bwt: 970g]<br>Recruitment: NICU                       | <b>Cream supplementation</b><br>IG: HM derived cream supplement<br>CG: Mothers own milk or donor's HM derived fortifier                                                                         | US Dept. of Agriculture/Agriculture Research Service, National Centre for Research resources<br>General Clinical research for Children, Prolacta Bioscience | None declared               |
| Shah (2016)          | Preterm (VLBW)<br>[GA: 27wk, Bwt: <1500g]<br>Recruitment: NICU                     | <b>Early and delayed fortification</b><br>G1: Early fortification (20ml/kg/d of HM feeds)<br>G2: Delayed fortification (100ml/kg/d of HM feeds)                                                 | Not mentioned in the paper                                                                                                                                  | Not mentioned in the paper  |
| Taheri (2016)        | Preterm (VLBW)<br>[GA: 28-34wk, Bwt: 1294g]<br>Recruitment: NICU                   | <b>Early and delayed fortification</b><br>G1: Early fortification (1 <sup>st</sup> feeding)<br>G2: Late fortification (BF volume reached 75ml/kg/d)                                             | Not mentioned in the paper                                                                                                                                  | Not mentioned in the paper  |
| Tillman (2012)       | Preterm (VLBW)<br>[GA: <31wk, Bwt: 1123g]<br>Recruitment: Neonatal database (NICU) | <b>Early and delayed fortification</b><br><u>Fortification with Enfamil, powdered HM fortifier</u><br>G1: Early BM fortification (1 <sup>st</sup> feed)                                         | Not mentioned in the paper                                                                                                                                  | Not mentioned in the paper  |

| Author (year)    | Population Characteristics                                                                                 | Intervention                                                                                                                                                                                                                                                | Funding                                                    | Conflict of Interest       |
|------------------|------------------------------------------------------------------------------------------------------------|-------------------------------------------------------------------------------------------------------------------------------------------------------------------------------------------------------------------------------------------------------------|------------------------------------------------------------|----------------------------|
|                  |                                                                                                            | G2: Delayed fortification (when volume reached 50-80ml/kg/d)                                                                                                                                                                                                |                                                            |                            |
| Bhat (2001)      | Preterm (VLBW)<br>[GA: 26-34wk, Bwt: 1242g]<br>Recruitment: Special care baby unit                         | <b>Human milk fortification</b><br><u>When clinical conditions permitted</u><br>IG: Fortified HM<br>CG: HM only<br>Dose: 1g of fortifier added to 100ml of milk on day 1, and gradually increased to 4g added to 100ml on 3rd/4th day                       | Not mentioned in the paper                                 | Not mentioned in the paper |
| Morlacchi (2018) | Preterm (VLBW)<br>[GA: <32wk, Bwt: <1500g]<br>Recruitment: NICU                                            | <b>Human milk fortification and formula</b><br>G1: Fortified HM<br>G2: Preterm formula                                                                                                                                                                      | Authors received no financial support                      | None declared              |
| Kim (2017)       | Preterm (ELBW)<br>[GA: <32 wk, Bwt: 1087g]<br>Recruitment: NICU                                            | <b>Human milk and formula</b><br>G1: Donor human milk<br>G2: Preterm formula<br><u>Infants fed G1&amp;G2 before achieving an enteral intake volume of 130 ml/kg/d</u>                                                                                       | Not mentioned in the paper                                 | None declared              |
| Lok (2017)       | Preterm (LBW, VLBW)<br>[GA: <37wk, Bwt: <2200g, VLBW: <1500g, LBW: ≥1500g and <2200g]<br>Recruitment: NICU | <b>Human milk and formula</b><br><u>1-4d after birth and continued at 10-20 ml/kg/d as tolerated for up to 5 days</u><br>Category 1: LBW, Category 2: VLBW; Both the groups further divided into-<br>G1: Any BM (human/donor)<br>G2: No BM (infant formula) | Small Project Fund of Univ. Of Hongkong                    | None declared              |
| Manea (2016)     | Preterm (ELBW)<br>[GA: 25-33wk, Bwt: <1,000g]<br>Recruitment: Children hospital                            | <b>Human milk and formula</b><br><u>Once enteral nutrition (24-48 hrs of life) started until initiation of bottle feeding</u><br>G1: Human BM<br>G2: Formula                                                                                                | Not mentioned in the paper                                 | Not mentioned in the paper |
| Morley (2000)    | Preterm (LBW)<br>[GA: ≤31wk, Bwt: <1850g]<br>Recruitment: Neonatal unit                                    | <b>Human milk and formula</b><br><u>Fed until they reach wt. of 2000g or discharged from NICU</u>                                                                                                                                                           | Farley Health Products (division of HJ Heinz Company Ltd.) | Not mentioned in the paper |

| Author (year)      | Population Characteristics                                                     | Intervention                                                                                                                                                                                                                                                                                                                | Funding                                                | Conflict of Interest          |
|--------------------|--------------------------------------------------------------------------------|-----------------------------------------------------------------------------------------------------------------------------------------------------------------------------------------------------------------------------------------------------------------------------------------------------------------------------|--------------------------------------------------------|-------------------------------|
|                    | and breast milk bank centre/<br>without BM banks                               | Category 1: As sole diet<br>Category 2: As supplement to HM<br>G1: Banked donor milk<br>G2: Preterm formula                                                                                                                                                                                                                 |                                                        |                               |
| O'connor<br>(2016) | Preterm (ELBW)<br>[GA: 27.5wk, Bwt: 995g]<br>Recruitment: NICU                 | <b>Human milk and formula</b><br><u>Initiated after birth and advanced at a rate of<br/>10-25 ml/kg/d up to 160ml/kg/d</u><br>G1: Donor milk<br>G2: Preterm formula                                                                                                                                                         | Not mentioned in the paper                             | Not mentioned in the<br>paper |
| Moya<br>(2012)     | Preterm (ELBW)<br>[GA: ≤30wk, Bwt: 1000g]<br>Recruitment: NICU                 | <b>Liquid and powdered fortification</b><br><u>From birth to 28 days</u><br>G1: Liquid HMF<br>G2: Powdered HMF                                                                                                                                                                                                              | Mead Johnson Nutrition                                 | Not mentioned in the<br>paper |
| Kanmaz<br>(2012)   | Preterm (ELBW)<br>[GA: 28wk, Bwt: 1092g]<br>Recruitment: NICU                  | <b>Different levels of fortification</b><br><u>When full feedings were achieved</u><br>G1: Standard fortification<br>[1.2g HMF+30ml HM]<br>G2: Moderate fortification<br>[1.2g HMF+25ml HM]<br>G3: Aggressive fortification<br>[1.2g HMF+20ml HM]                                                                           | Authors received no financial<br>support               | None declared                 |
| Porcelli<br>(1999) | Preterm (VLBW, ELBW)<br>[GA: 25-32wk, Bwt: 600-<br>1500g]<br>Recruitment: NICU | <b>Different fortifier</b><br>G1: Test HMF (1 g of protein/100 ml of<br>supplemented milk, 85% glucose polymers,<br>15% lactose, and calcium, phosphorus,<br>sodium, copper)<br>G2: Reference HMF (60% whey protein and<br>40% casein, 75% glucose polymers, 25% lactose<br>and calcium, phosphorus, sodium, and<br>copper) | Wyeth Nutritionals<br>International, Philadelphia, USA | Not mentioned in the<br>paper |
| Kumar              | Preterm (ELBW)                                                                 | <b>Different formula</b>                                                                                                                                                                                                                                                                                                    | Not mentioned in the paper                             | None declared                 |

| Author (year)                           | Population Characteristics                                                                       | Intervention                                                                                                                                                                                      | Funding                                     | Conflict of Interest                                                                                                                                                                                                     |
|-----------------------------------------|--------------------------------------------------------------------------------------------------|---------------------------------------------------------------------------------------------------------------------------------------------------------------------------------------------------|---------------------------------------------|--------------------------------------------------------------------------------------------------------------------------------------------------------------------------------------------------------------------------|
| (2017)                                  | [GA: 27wk, Bwt: 993g]<br>Recruitment: NICU                                                       | G1: Similac liquid human milk fortifier (Similac Human Milk Fortifier Hydrolyzed Protein Conc. Liquid)<br>G2: Enfamil liquid human milk fortifier (Enfamil human milk fortifier acidified liquid) |                                             |                                                                                                                                                                                                                          |
| Amesz (2010)                            | Preterm (VLBW)<br>[GA: ≤32wk, Bwt: 1338g]<br>Recruitment: Neonatal unit                          | <b>Different formulas</b><br><u>Until term CA</u><br>G1: Post discharge formula<br>G2: Term formula<br>G3: HM fortified formula                                                                   | Friesland Food, Leeuwarden, the Netherlands | None declared                                                                                                                                                                                                            |
| Lucas (1992)                            | Preterm (VLBW)<br>[GA: 31wk, Bwt: 1475g]<br>Recruitment: NICU                                    | <b>Different formula</b><br>G1: Follow-on preterm formula (FPF- Farley's Premcare)<br>G2: Standard term formula (STF-Farley's Oster Milk)                                                         | Farley Health Products                      | Not mentioned in the paper                                                                                                                                                                                               |
| Flaherman (2013)                        | Term infants<br>[>37 wk who lost ≥5% Bwt before 36 hrs of age]<br>Recruitment: Children hospital | <b>Continued EBF and early limited formula</b><br><u>Who lost ≥5% of birth weight before 36 hrs</u><br>IG: Early limited formula (ELF 10 ml using feeding syringe)<br>CG: Continued EBF           | National Institutes of Health (NIH)         | One of the author served as a paid consultant for the following companies: Abbott Nutrition (Abbott Park, IL), Mead-Johnson (Evansville, IN), Nestle SA (Vevey, Switzerland), and Pfizer Consumer Products (Madison, NJ) |
| <b>Enteral feed interventions (n=8)</b> |                                                                                                  |                                                                                                                                                                                                   |                                             |                                                                                                                                                                                                                          |
| Akintorin (1997)                        | Preterm (VLBW, ELBW)<br>[GA: 28wk, Bwt: 700-1250g]                                               | <b>CNG and IBG feeds</b>                                                                                                                                                                          | Not mentioned in the paper                  | Not mentioned in the paper                                                                                                                                                                                               |

| Author (year)      | Population Characteristics                                                         | Intervention                                                                                                                                                                                  | Funding                                                             | Conflict of Interest       |
|--------------------|------------------------------------------------------------------------------------|-----------------------------------------------------------------------------------------------------------------------------------------------------------------------------------------------|---------------------------------------------------------------------|----------------------------|
|                    | Category 1: 700-1000g<br>Category 2: 1001-1250g<br>Recruitment: NICU               | <u>Parenteral nutrition started on days 2 to 3 and continued until each infant tolerated full enteral feedings</u><br>G1: CNG vs IBG<br>G2: CNG vs IBG                                        |                                                                     |                            |
| Mosqueda (2008)    | Preterm (ELBW)<br>[GA: 26wk, Bwt:760g]<br>Recruitment: NICU                        | <b>Intravenous and nasogastric feeds</b><br>G1: Intravenous alimentation alone (NPO-None per orem)<br>G2: Small boluses of nasogastric feedings (Minimal enteral nutrition)                   | Not mentioned in the paper                                          | Not mentioned in the paper |
| Kliethermes (1999) | Preterm (LBW)<br>[GA: ≤32wk, Bwt: 1685g]<br>Recruitment: Regional perinatal centre | <b>Nasogastric and bottle feeds</b><br>G1: Nasogastric tube<br>G2: Bottle feeding                                                                                                             | Not mentioned in the paper                                          | Not mentioned in the paper |
| Bora (2017)        | Preterm (VLBW)<br>[GA: 35wk, Bwt: 1357g]<br>Recruitment: NICU                      | <b>Complete and minimal feeds</b><br>G1: Complete enteral feed (CEF) with EBM<br>G2: Minimal enteral feed (MEF) with IVF (trophic feeds 20 ml/kg of EBM and 60ml/kg 10% Dextrose by IV route) | Not mentioned in the paper                                          | Not mentioned in the paper |
| Colaizy (2012)     | Preterm (ELBW)<br>[GA: 27wk, Bwt: 889g]<br>Recruitment: NICU                       | <b>Different levels of feeds</b><br><u>Total enteral intake as HM, donor milk, Mixed HM/DM</u><br>G1: <25%, G2: 25-50%, G3: 50-75%<br>G4: >75%                                                | NIH K23HD057232                                                     | None declared              |
| Thomas (2012)      | Preterm (VLBW)<br>[GA: 31.7wk, Bwt: 1220g]<br>Recruitment: NICU                    | <b>High and standard volume feeds</b><br>G1: High volume feeds (300ml/kg/d of EBM)<br>G2: Standard volume feeds (200ml/kg/d of EBM)                                                           | Not mentioned in the paper                                          | Not mentioned in the paper |
| Salas (2018)       | Preterm (ELBW)<br>[GA: 22-28wk, Bwt: 833g]<br>Recruitment: NICU                    | <b>Early and delayed feeding</b><br>G1: Early progressive feeding without trophic feeding                                                                                                     | Gerber Foundation WAC and NIH (Grants U10 HD 34216 and ULTTR001417) | None declared              |

| Author (year)                    | Population Characteristics                                                                    | Intervention                                                                                                                                                                                                                                                                                                | Funding                                                                                                                                                           | Conflict of Interest       |
|----------------------------------|-----------------------------------------------------------------------------------------------|-------------------------------------------------------------------------------------------------------------------------------------------------------------------------------------------------------------------------------------------------------------------------------------------------------------|-------------------------------------------------------------------------------------------------------------------------------------------------------------------|----------------------------|
|                                  |                                                                                               | G2: Delayed progressive feeding after 4d course of trophic feeding                                                                                                                                                                                                                                          |                                                                                                                                                                   |                            |
| Zecca (2014)                     | Preterm (LBW)<br>[GA: 32-36wk, Bwt: >1499g]<br>Recruitment: NICU                              | <b>Proactive and standard feeds</b><br>G1: Proactive Feeding Regimen (1 <sup>st</sup> d of life-100ml/kg/d of HM, day 2-130ml/kg/d, day 3-165ml/kg/d, day 4-discharge 200ml/kg/d)<br>G2: Standard Feeding Regimen (1 <sup>st</sup> d of life-60ml/kg/d of HM and gradually increased to170ml/kg/d by day 9) | Not mentioned in the paper                                                                                                                                        | None declared              |
| <b>Other interventions (n=6)</b> |                                                                                               |                                                                                                                                                                                                                                                                                                             |                                                                                                                                                                   |                            |
| Aly (2017)                       | Preterm (VLBW)<br>[GA: ≤34wk, Bwt: 1300g]<br>Recruitment: NICU                                | <b>Bee honey</b><br>G1: 5g, G2: 10g, G3: 15g<br>G4: 0g (control)                                                                                                                                                                                                                                            | Not mentioned in the paper                                                                                                                                        | None declared              |
| Heon (2016)                      | Mothers of EP infants<br>Recruitment: NICU                                                    | <b>Electric breast pump</b><br>IG: Standard care + double electric breast pump + BM expression education and support intervention<br>CG: Education and support                                                                                                                                              | AWHONN, Canadian Institute of Health Research, Groupe de recherche interuniversitaire en interventions en sciences infirmieres du Quebec (GRIISIQ), Medela Canada | None declared              |
| Slusher (2007)                   | Mothers of preterm<br>[GA: 31wk]<br>Recruitment: Teaching and mission hospital                | <b>Electric breast pump</b><br>G1: Electric breast pump<br>G2: Non-electric pedal Pump<br>G3: Hand expression                                                                                                                                                                                               | Not mentioned in the paper                                                                                                                                        | Not mentioned in the paper |
| Kumar (2010)                     | Preterm (VLBW)<br>[GA: ≥32wk, Bwt: >1250-≤1600g]<br>Recruitment: Tertiary level Neonatal unit | <b>Nasogastric and spoon feeds</b><br><u>Trial 1</u><br>G1: NG feeding in hospital<br>G2: Spoon feeding in hospital<br><u>Trial 2</u><br>G1: Spoon feeding in hospital<br>G2: Spoon feeding at home                                                                                                         | Not mentioned in the paper                                                                                                                                        | Not mentioned in the paper |



| <b>Author (year)</b> | <b>Population Characteristics</b>                                               | <b>Intervention</b>                                                                                                                                                                                                      | <b>Funding</b>                        | <b>Conflict of Interest</b> |
|----------------------|---------------------------------------------------------------------------------|--------------------------------------------------------------------------------------------------------------------------------------------------------------------------------------------------------------------------|---------------------------------------|-----------------------------|
| Lau<br>(2012)        | Preterm (VLBW)<br>[GA: 28wk, Bwt: 1103g]<br>Recruitment: NICU                   | <b>Suckling and swallowing</b><br>IG1: Non-nutritive sucking exercise (pacifier use)<br>IG2: Swallowing exercise (placing a milk/formula bolus through syringe)<br>CG: Standard care                                     | Authors received no financial support | None declared               |
| Serrao<br>(2018)     | Mothers of preterm<br>[GA: 27-32wk]<br>Recruitment: Previously registered trial | <b>Galactagogue</b><br><u>From 3rd -28th d after delivery</u><br>G1: Silymarin-phosphatidylserine and galega (a daily single dose of 5 g of Piu'latte Plus MILTE)<br>G2: Placebo (a daily single dose of 5 g of lactose) | Authors received no financial support | None declared               |
